# Supplementary material for: Structural consequences of turnover-induced homocitrate loss in nitrogenase
Source: PubMed Central journal article supplement (PMC9968304; doi:10.1038/s41467-023-36636-4), 2023-02-25
Supplement: 41467_2023_36636_MOESM3_ESM.pdf [file 41467_2023_36636_MOESM3_ESM.pdf]

## Description of Additional Supplementary Files

### File name: Supplementary Data 1

**Description:** Proteomic hits from mass spectrometry experiment.

### File name: Supplementary Movie 1

**Description:** Three dimensional variability analysis component 0 of the MoFe<sup>Alkaline-inactivated</sup> cryoEM map with density corresponding to  $\alpha$ -subunits color-coded in blue and  $\beta$ -subunits in yellow.

### File name: Supplementary Movie 2

**Description:** A morph between the MoFe<sup>Alkaline-inactivated</sup> and MoFe<sup>AS-isolated</sup> structures illustrates a similar movement, with shifts apparent in  $\alpha$ III domain helices Pro  $\alpha$ 302 – Lys  $\alpha$ 315, Glu  $\alpha$ 318 – Arg  $\alpha$ 345, and Lys  $\alpha$ 426 – Met  $\alpha$ 434, and  $\beta$ -strand Lys  $\alpha$ 349 – Ile  $\alpha$ 355.
